# Supplementary material for: Prevalence of Virus Infections and GLRaV-3 Genetic Diversity in Selected Clones of Croatian Indigenous Grapevine Cultivar Plavac Mali
Source: MDPI journal article supplement (doi:10.3390/pathogens11020176), 2022-01-27
Supplement: s1 [file s1]

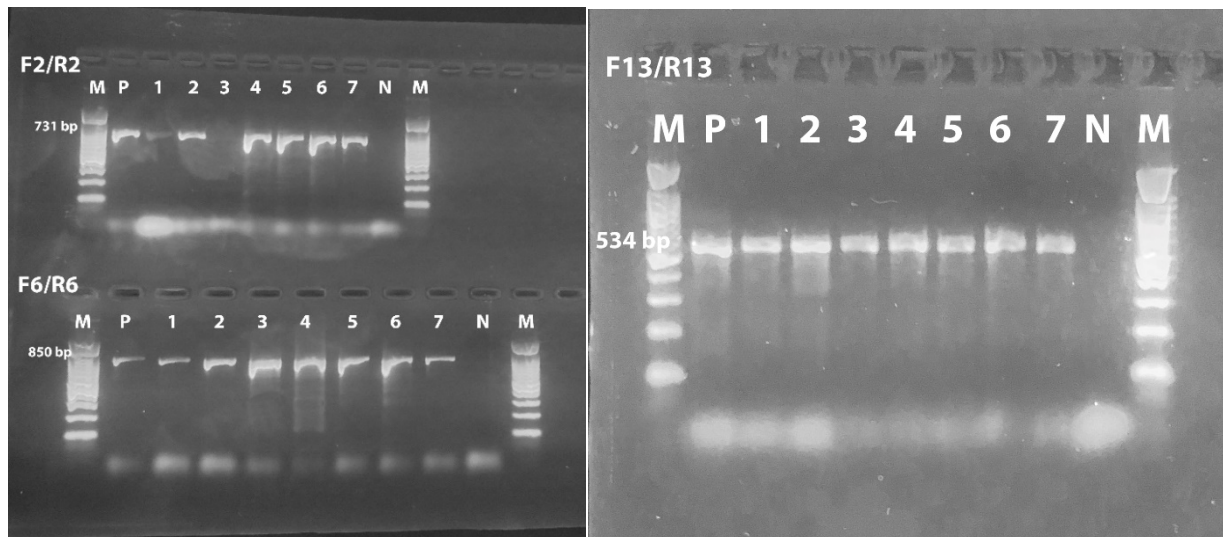

Supplementary Figure S1. An example of gel electrophoresis of PCR products obtained for grapevine badnavirus 1 using the HotStartTaq DNA Polymerase Kit (Qiagen, Hilden, Germany) and different primer combinations targeting different viral genome re-gions (F2/R2 - product size 731 base pairs (bp), F6/R6 - 850 bp and F13/R13 - 534 bp). Lines: M - GelPilot 100 bp Plus Ladder (Qiagen, Hilden, Germany), P - positive control, 1 - 020/1, 2 - 020/2, 3 - 026/1, 4 - 026/3, 5 - 214/1, 6 - 214/2, 7 - 261/1, N - negative control.

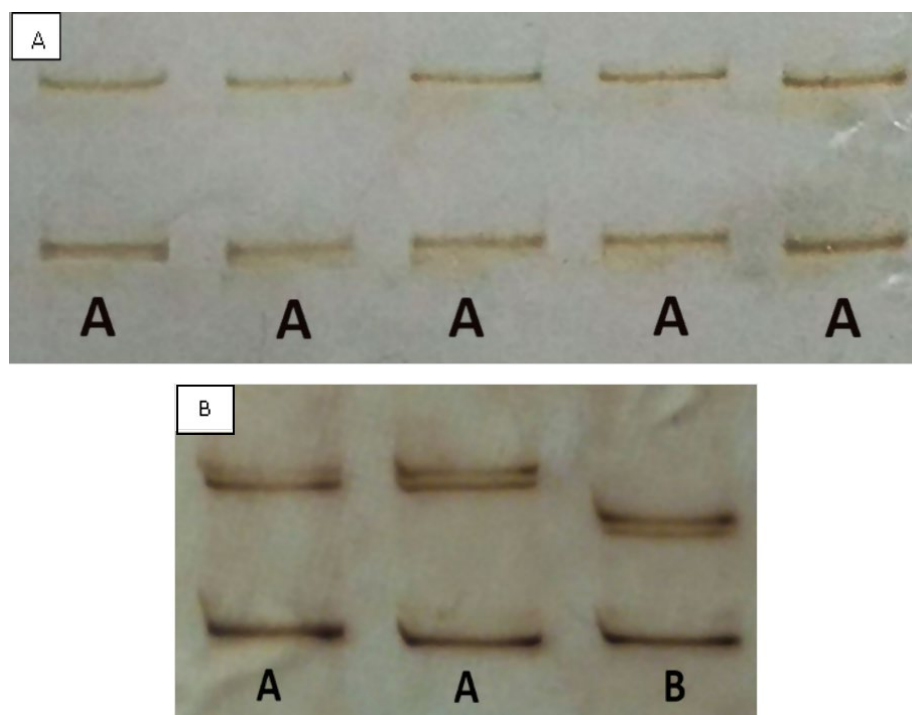

Supplementary Figure S2. The identification of different genomic variants of GLRaV-3 by single-strand conformation polymorphism (SSCP) analysis. Clones displaying pattern A have the same nucleotide composition, while clone displaying pattern B belongs to different genomic variant, as confirmed by sequencing.

Supplementary Table S1. Sequenced bacterial colonies obtained from individual vines along with their accession number and phylogenetic cluster they represent

| Clone_bacterial colony | Accession number | Cluster |
|------------------------|------------------|---------|
| 008_16                 | MZ450926         | II      |
| 008_26                 | MZ450927         | II      |
| 041_30                 | MZ450928         | II      |
| 041_6                  | MZ450929         | II      |
| 202_10                 | MZ450930         | II      |
| 202_1                  | MZ450931         | II      |
| 225_17                 | MZ450932         | II      |
| 225_2                  | MZ450933         | II      |
| 020_1_1                | MZ450934         | II      |
| 020_1_6                | MZ450935         | II      |
| 036_1_14               | MZ450936         | II      |
| 036_1_3                | MZ450937         | II      |
| 036_1_7                | MZ450938         | II      |
| 096_4_21               | MZ450939         | I       |
| 096_4_22               | MZ450940         | II      |
| 214_1_11               | MZ450941         | I       |
| 214_1_15               | MZ450942         | I       |
| 214_1_1                | MZ450943         | I       |
| 214_1_6                | MZ450944         | I       |
| 214_1_7                | MZ450945         | I       |
| 096_4_25               | MZ450946         | I       |
| 268_1_1                | MZ450947         | II      |
| 268_1_9                | MZ450948         | II      |
